# Supplementary material for: Efficiency of Automated Viral RNA Purification for Pediatric Studies of Dengue and Zika in Hyperendemic Areas
Source: Hindawi journal article supplement (doi:10.1155/2023/1576481), 2023-09-30
Supplement: f1 [file 1576481.f1.pdf]

Supplemental Information

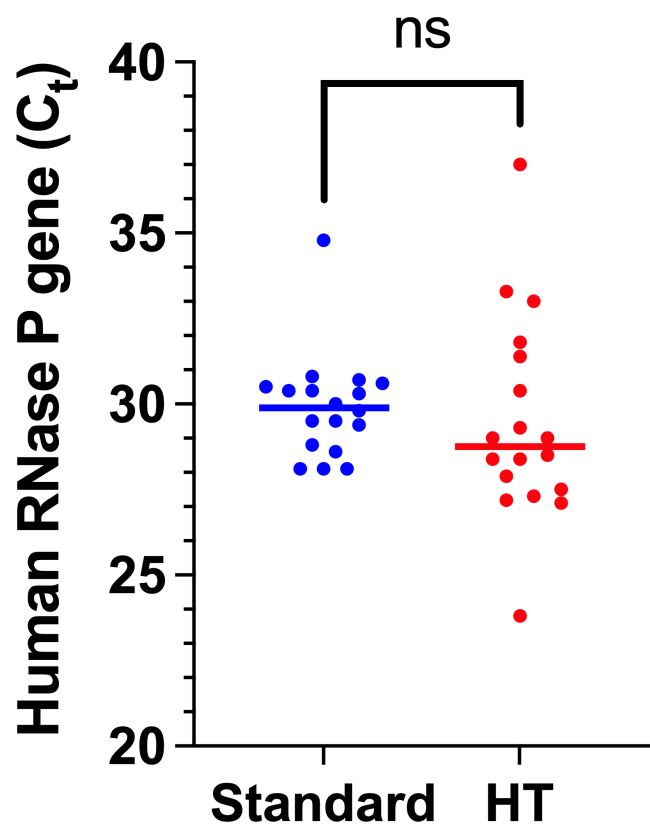

**Supplemental Figure 1.** RNase P amplification from RNA isolated automatically. RNA was purified with two protocols with the KingFisher™ Flex instrument and the expression of the constitutive gene was evaluated by RT-qPCR. The median is shown. C<sub>t</sub>: Cycle threshold. ns: non-significant. HT: high-throughput.

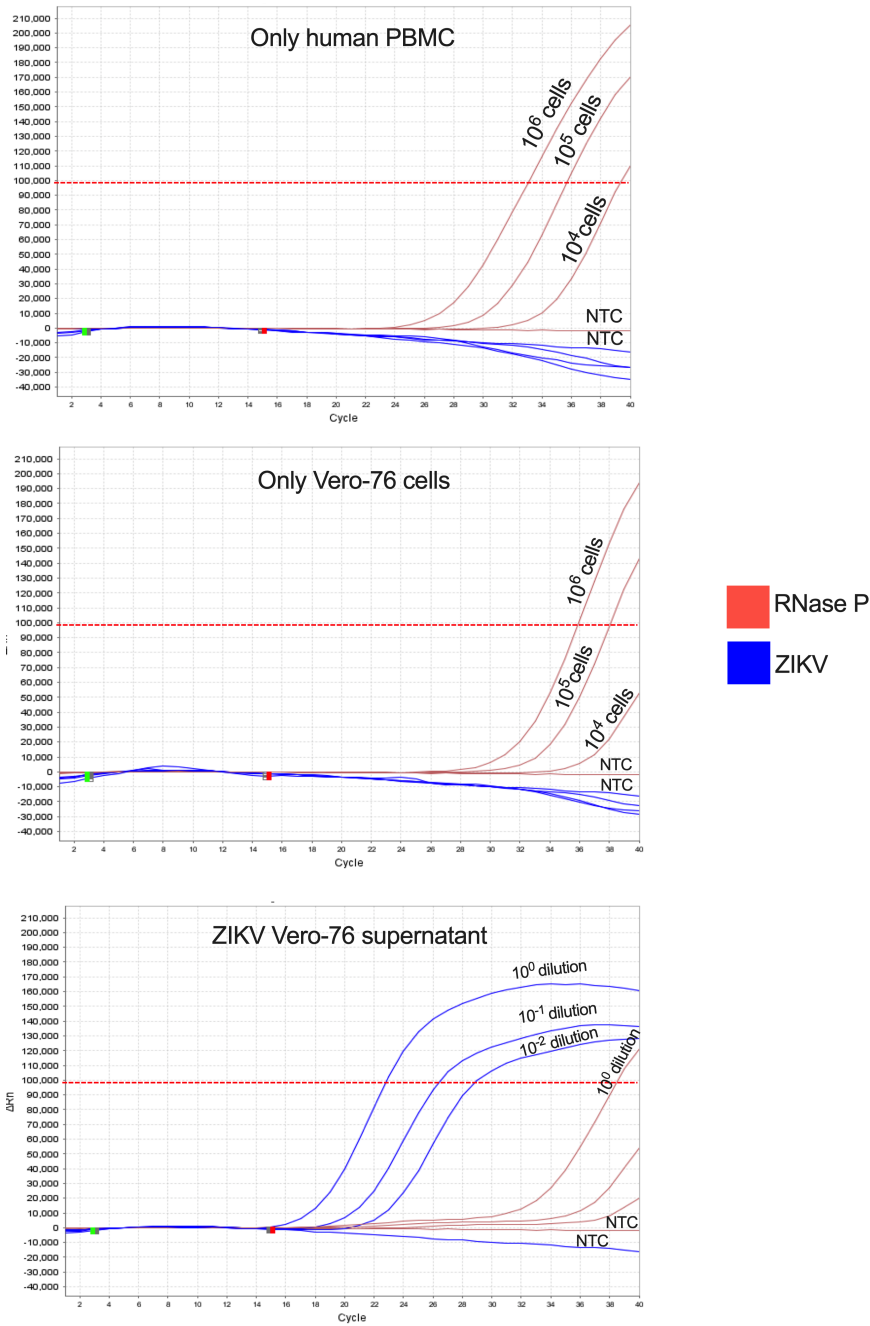

**Supplemental Figure 2.** RNA from  $1 \times 10^6$  human peripheral blood mononuclear cells (PBMC) and Vero-76 cells infected or not with ZIKV were purified automatically. Dilutions in  $\text{Log}_{10}$  were realized. Amplification of the human RNase P was detected by RT-qPCR. Red line: RNase P curves. Blue line: ZIKV curves. NTC: no-template control.  $C_t \leq 37$  was accepted as positive.

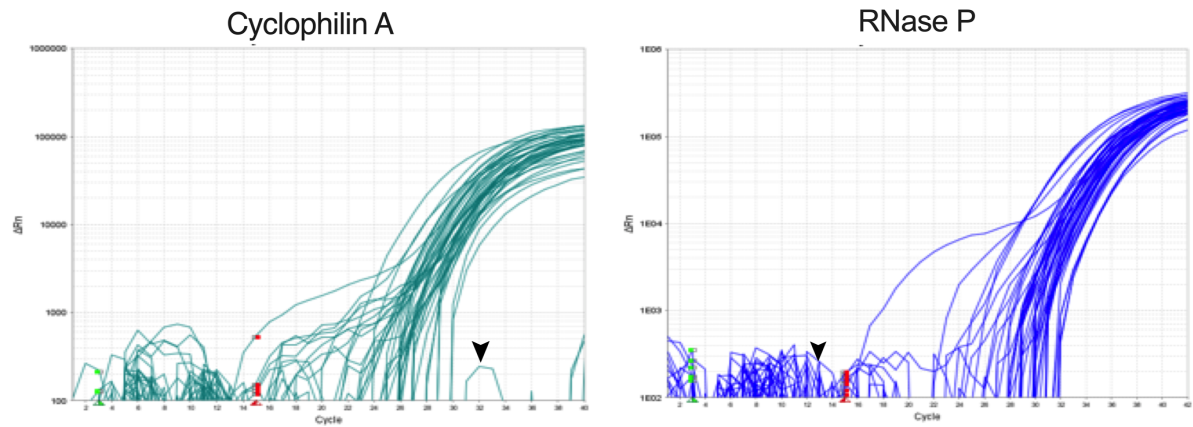

**Supplemental Figure 3.** Internal control for amplification of constitutive Cyclophilin A and RNase P genes. RNA from pediatric plasma spiked for ZIKV (n=40) was isolated automatically with the standard protocol. A commercial kit (left plot) and in-house (right plot) RT-qPCR assays for ZIKV detection were tested. NTC: no-template control is highlighted with the black arrowheads.
